# Supplementary material
Source: bioRxiv or medRxiv preprint supplement (https://www.medrxiv.org/highwire/filestream/74930/field_highwire_adjunct_files/2/2020.03.30.20045740-3.pdf)

Singleton cases

CLUSTER 3: local cluster

CLUSTER 4: Hotpot party-related SSE

(★: Hotpot party site)

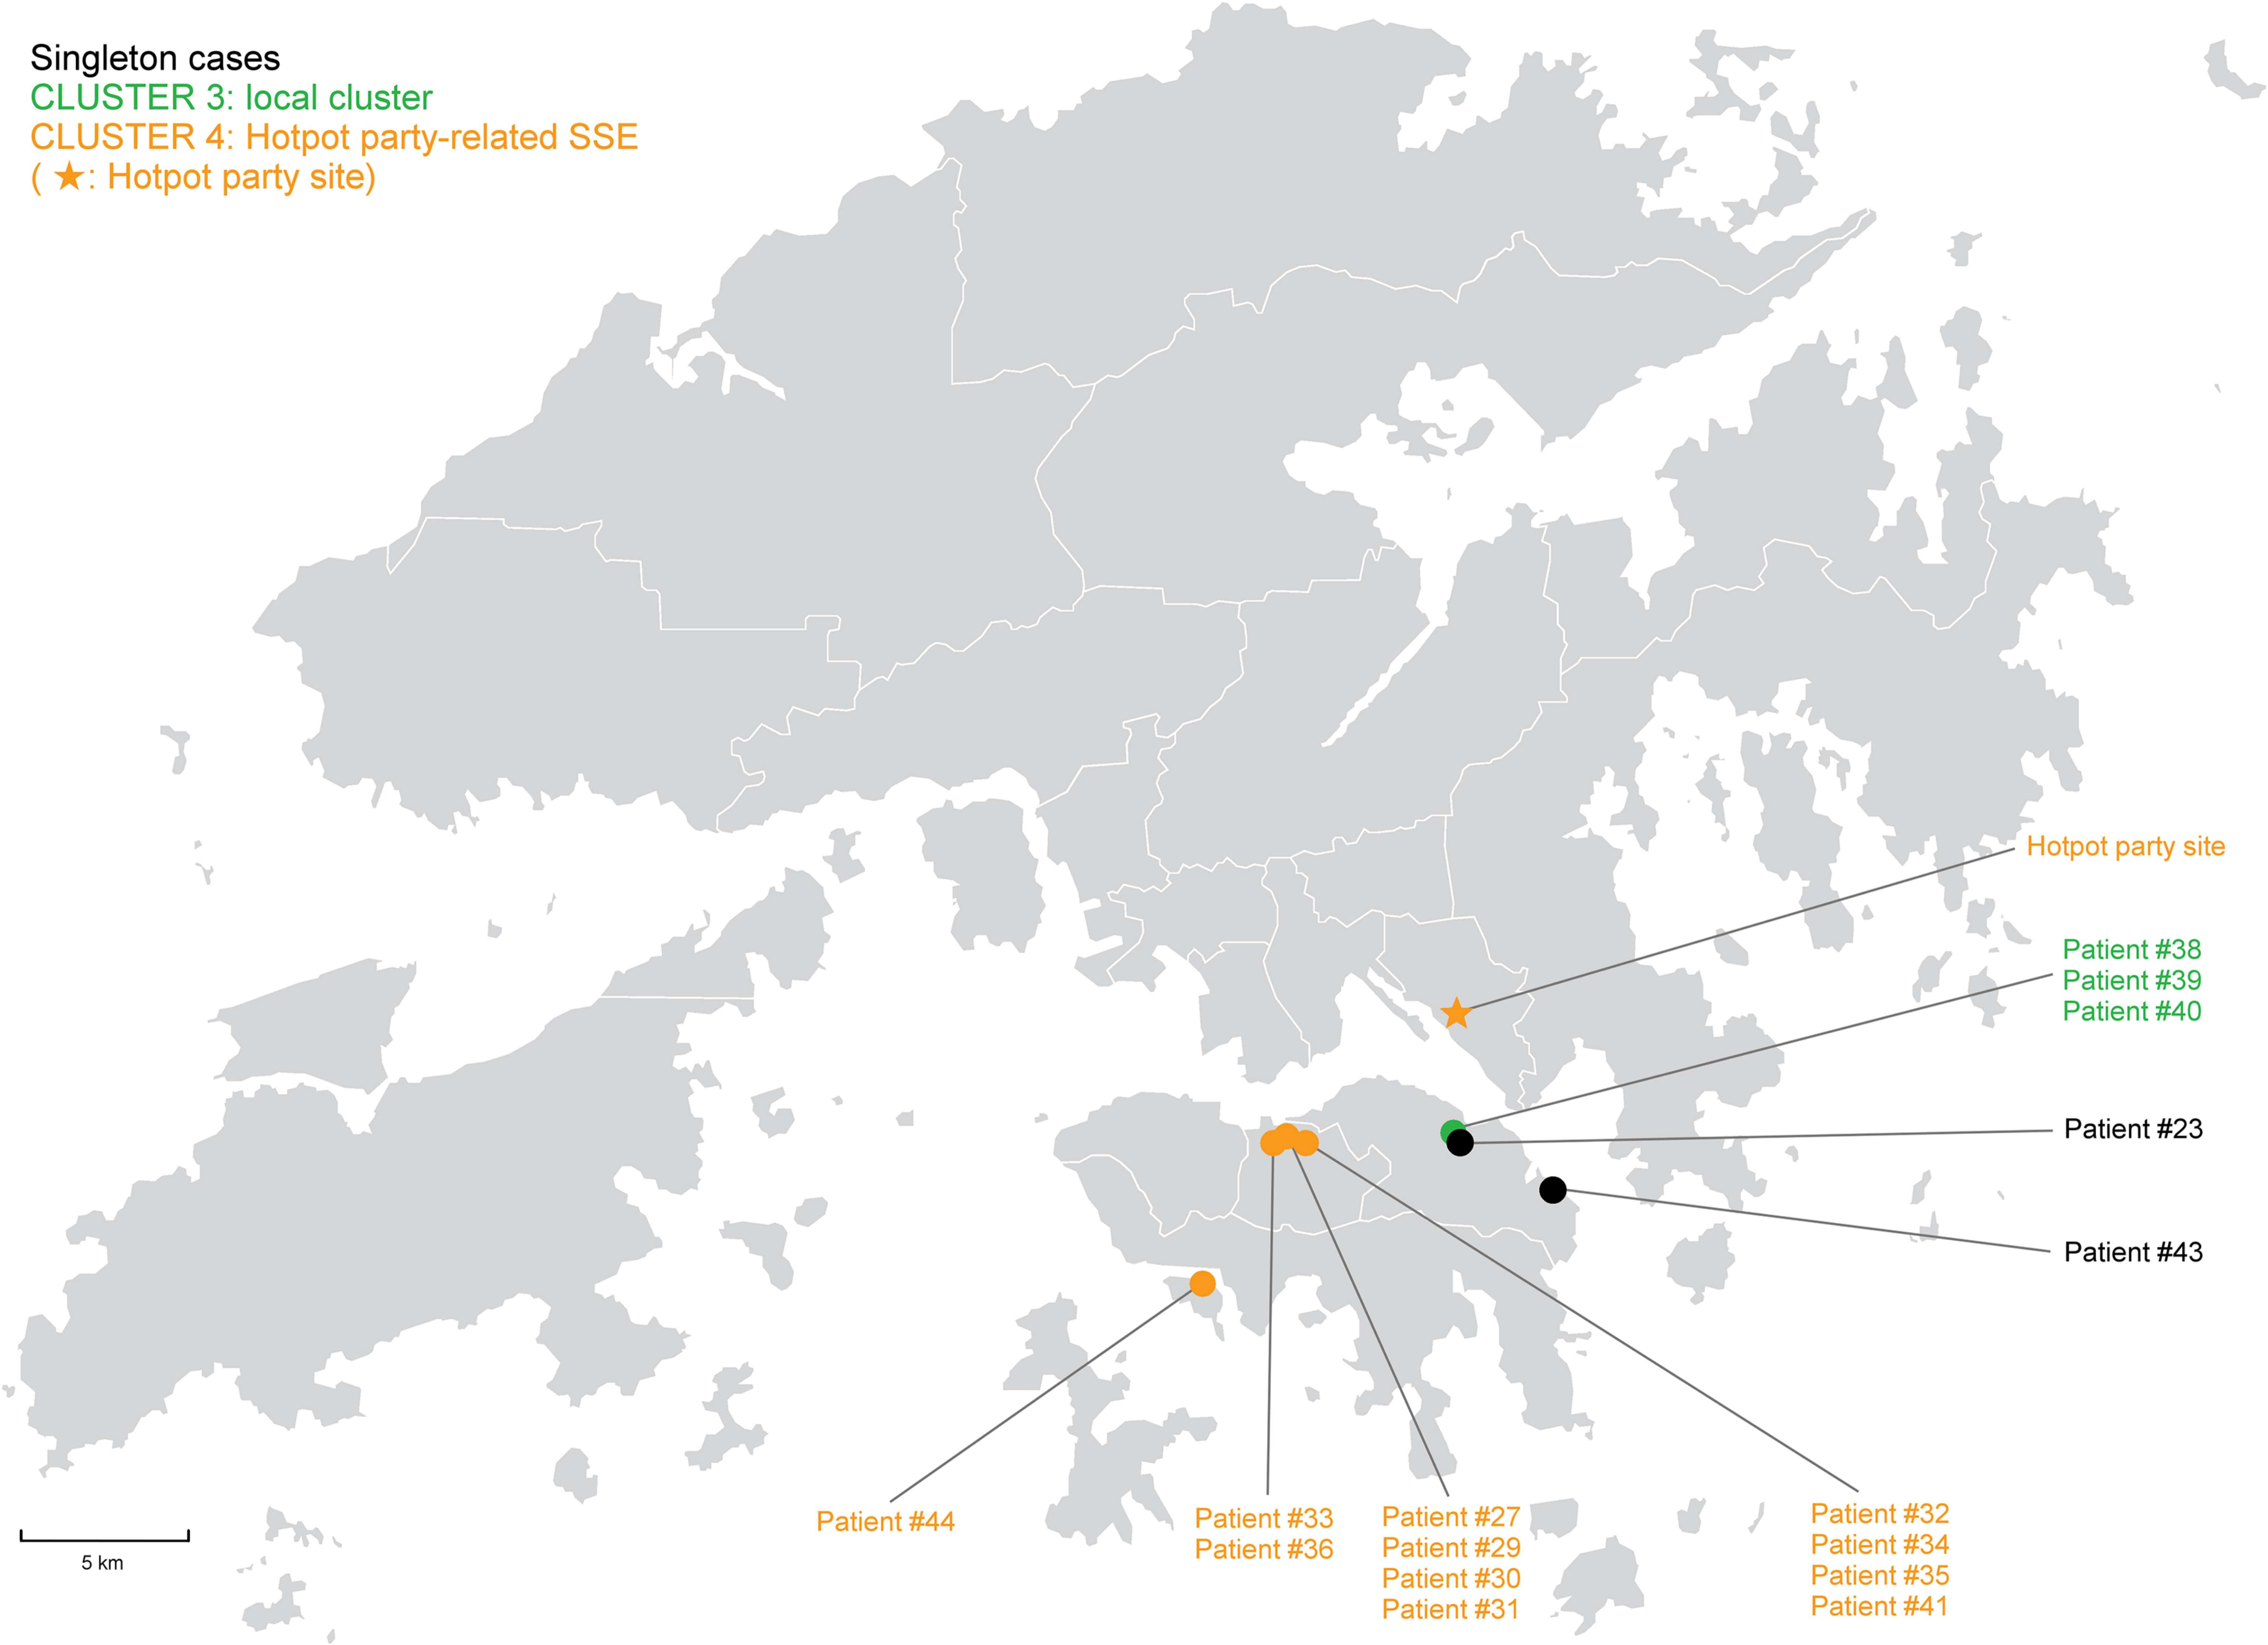

Supplement: Supplementary file [file 2020.03.30.20045740-3.pdf]
